# Supplementary material for: Identification of distinct and age‐dependent p16High microglia subtypes
Source: PubMed Central journal article supplement (PMC8520715; doi:10.1111/acel.13450), 2021-10-01
Supplement: ACEL-20-e13450-s002.pdf [file ACEL-20-e13450-s002.pdf]

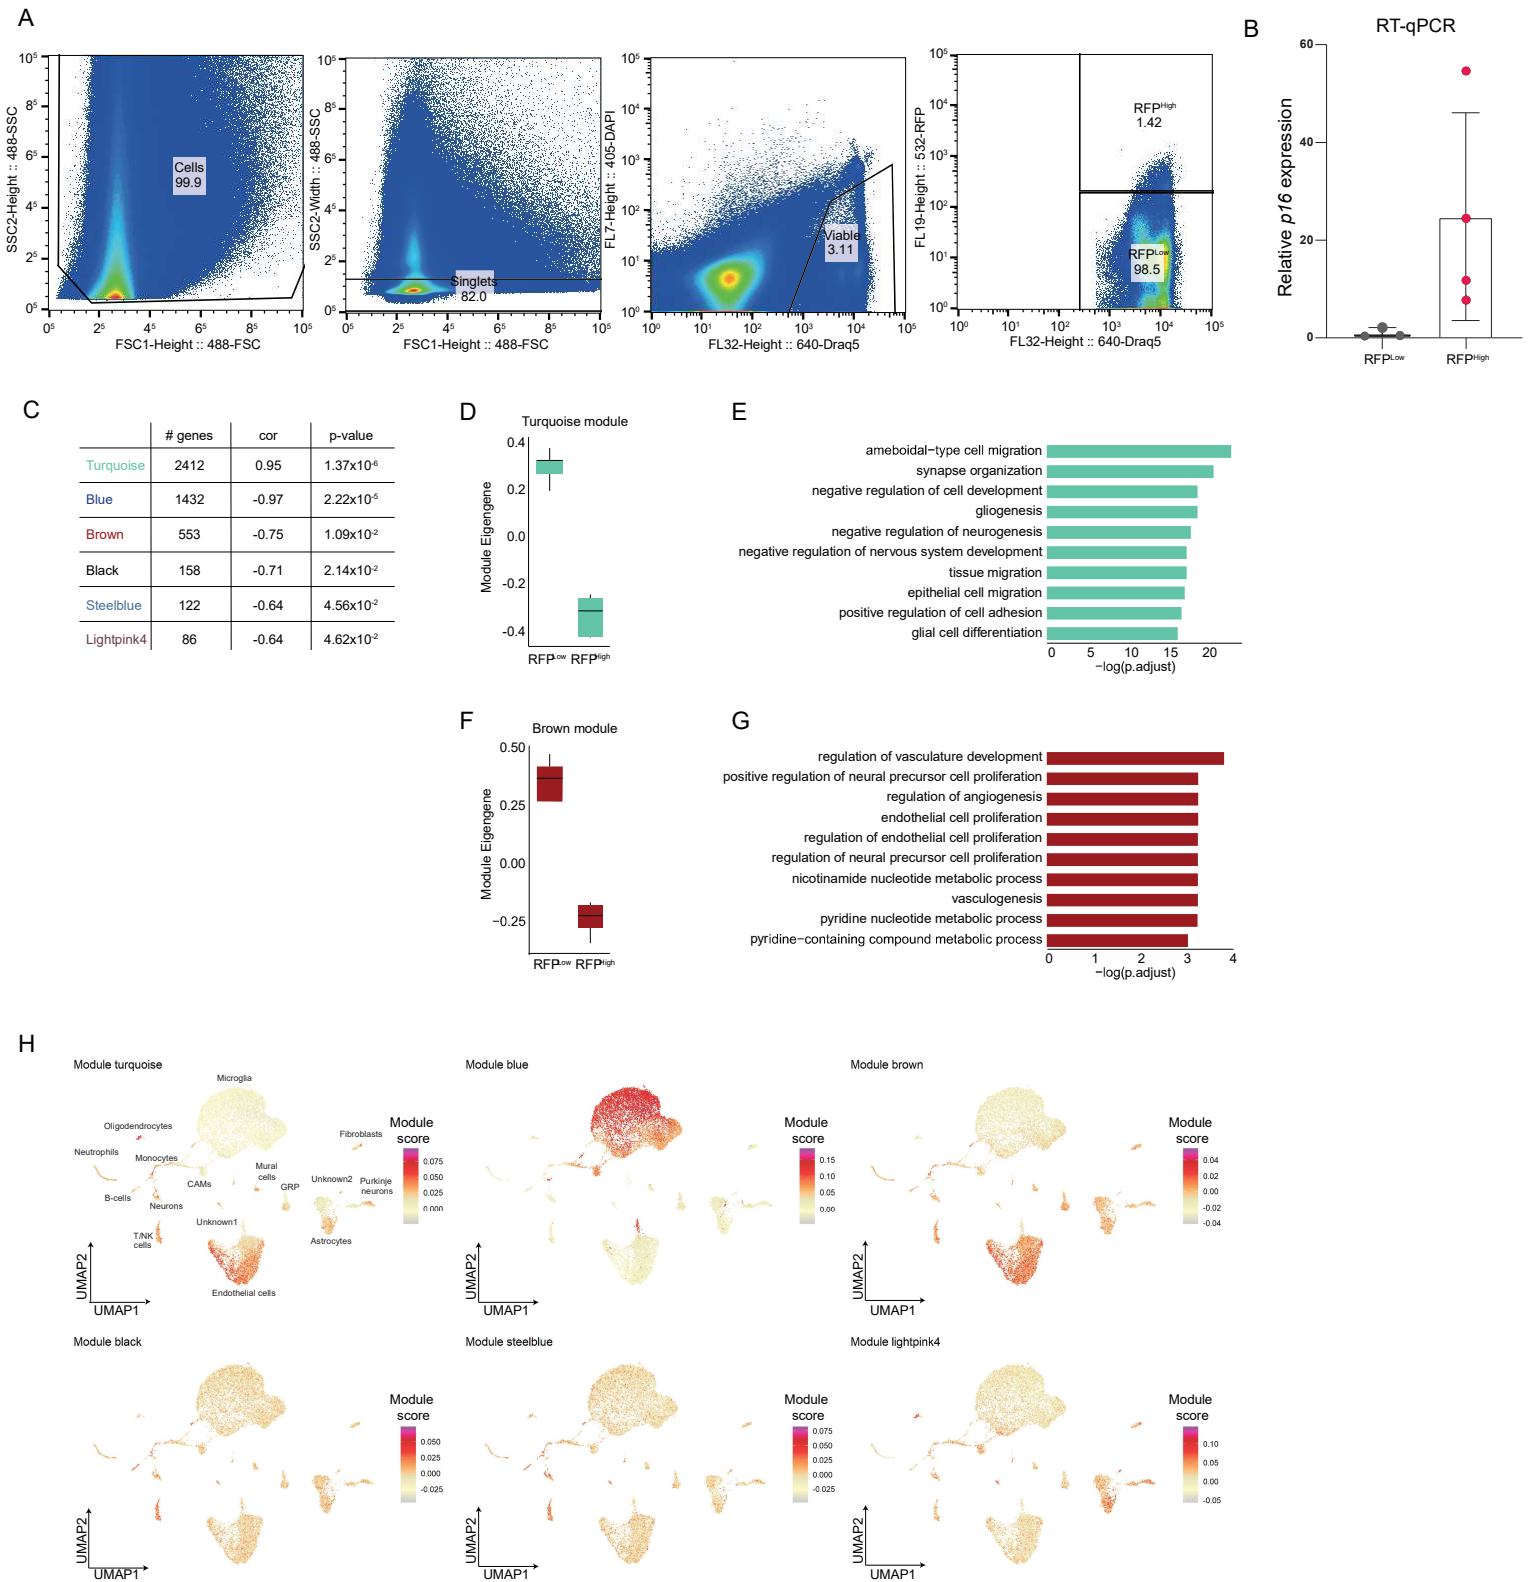

**Figure S1: WGCNA module expression between cell types.**

A: Gating strategy for sorting RFP<sup>High</sup> cells by FACS. B: p16 expression measured by qPCR in old mouse brains. C: List of significant weighted gene correlation network analysis (WGCNA) modules between RFP<sup>Low</sup> and RFP<sup>High</sup> samples. D-G: ModuleEigengene expression levels and gene ontology analysis of WGCNA modules enriched in RFP<sup>Low</sup> samples. H: UMAPs depicting the expression of WGCNA modules in all isolated cell types in single cell data set.

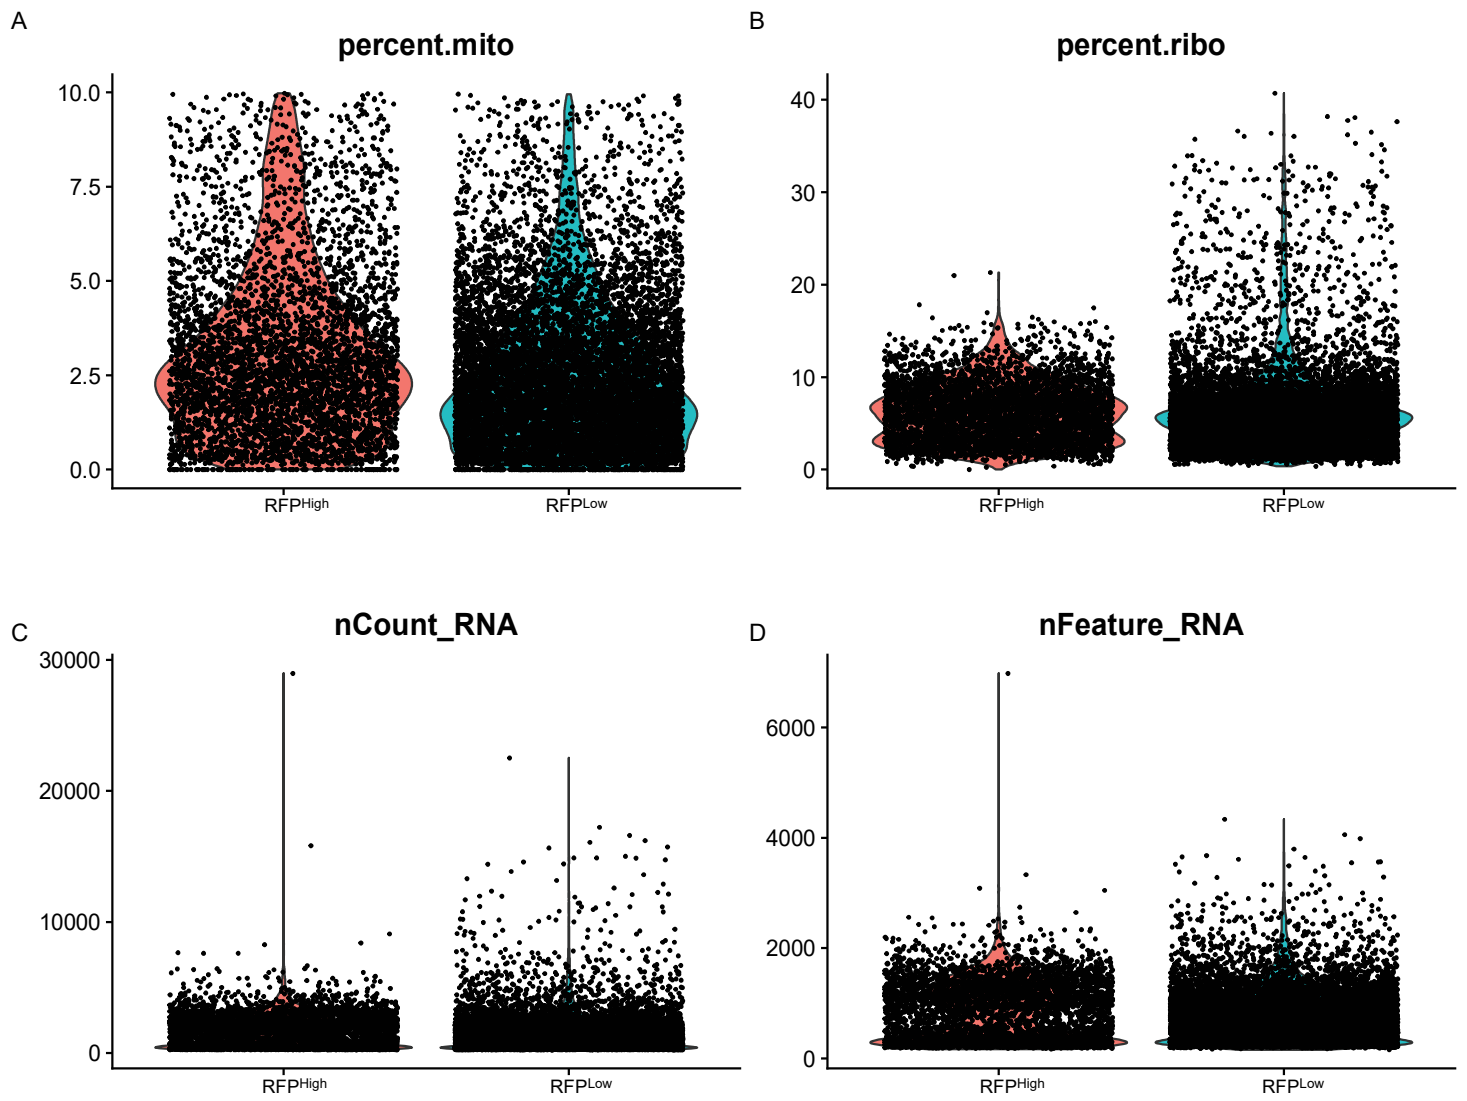

**Figure S2: Quality control of scRNAseq**

A: Percentage mitochondrial RNA, B: percentage ribosomal RNA, C: read counts and D: number of unique genes detected in RFP<sup>Low</sup> and RFP<sup>High</sup> samples.

A

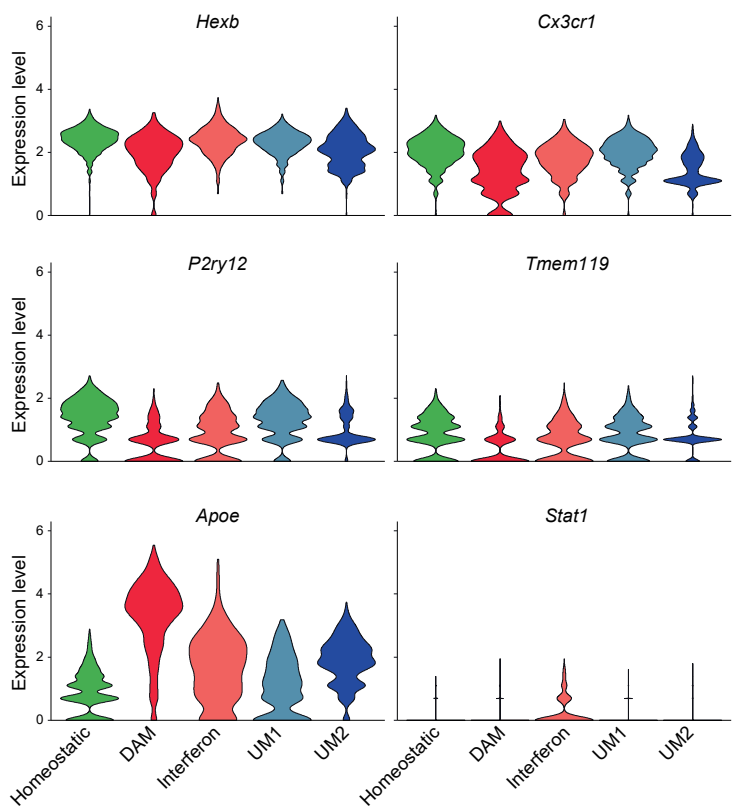

B

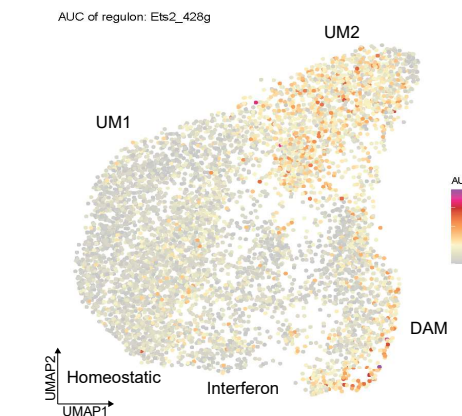

C

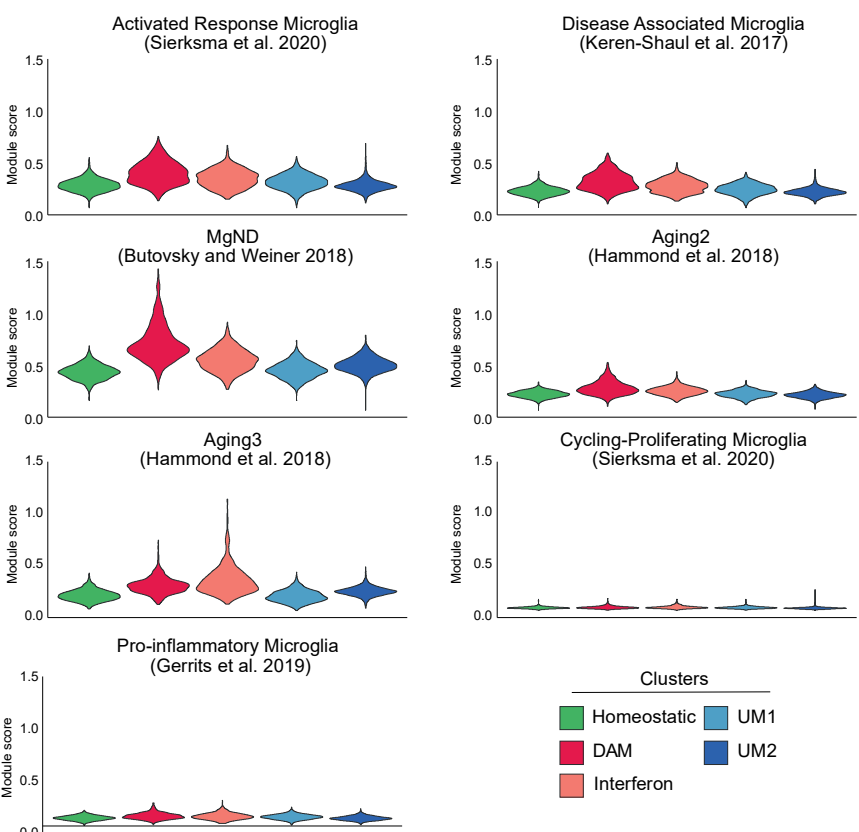

D

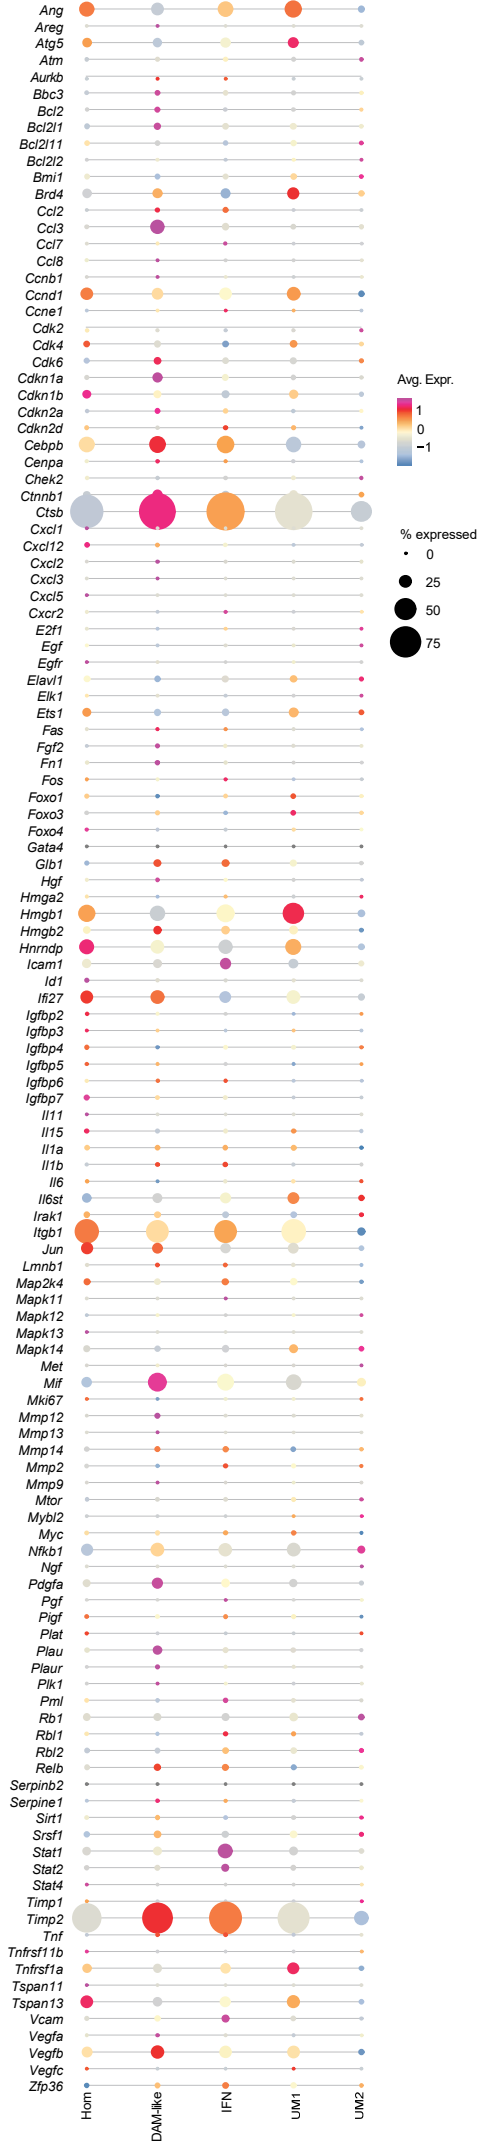

**Figure S3: Microglia clusters in literature do not resemble p16<sup>pos</sup> microglia.**

A: Violin plot depicting the expression of *Hexb*, *Cxcr1*, *P2ry12*, *Tmem119*, *ApoE* and *Stat1* respectively in each cell of the microglia cluster. B: UMAP depicting *Ets2* regulon expression in all microglia. C: Violin plots showing the expression of subtype signatures from the literature in each cluster. D: Dot plot showing expression of senescence genes in microglia clusters.
